# Supplementary material
Source: PubMed Central journal article supplement (PMC8096318)
Supplement: mmc1.pdf [file mmc1.pdf]

# THE LANCET Microbe

## Supplementary appendix

This appendix formed part of the original submission and has been peer reviewed.  
We post it as supplied by the authors.

Supplement to: Antonelli G, Anastasi E, Ciprani F, et al. Asymptomatic individuals positive for anti-SARS-CoV-2 antibodies negative on molecular swab. *Lancet Microbe* 2021; 2: e178

## Supplementary appendix

Supplement to: THELANCETMICROBE-D-21-00103

Anti-SARS-CoV-2 antibody positive asymptomatic subjects result negative on molecular swab.

Guido Antonelli et al.

Table. Past SARS-CoV-2 infection in specific groups of subjects and rate of positivity at molecular swab of seropositive subjects.

| Group of subjects                       | Number of subjects examined | Number positive for antibodies (%) <sup>^</sup> | Number positive at molecular swab/number examined (%) <sup>^^</sup> |
|-----------------------------------------|-----------------------------|-------------------------------------------------|---------------------------------------------------------------------|
| Police officers                         | 6,731                       | 129 (1.9)                                       | 1/129 (0.8)                                                         |
| Workers from different areas (see text) | 10,646                      | 83 (0.7)                                        | 0/83 (0)                                                            |

<sup>^</sup> LIAISON® SARS-CoV-2 S1/S2 IgG (DiaSorin) or Elecsys® Anti SARS-CoV-2 – Cobas (Roche Diagnostics)

<sup>^^</sup> Molecular swab. For methods see reference no. 4.
